# Supplementary material
Source: Springer Nature journal article supplement (https://www.springermedizin.de/resource/supplementary/12936_2011_1946_MOESM9_ESM.pdf/9542110)
Supplement: MOESM9 [file 9542110]

# ARTESUNAT®

Artesunate 50mg

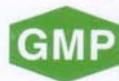

12 Tablets

12 Comprimés

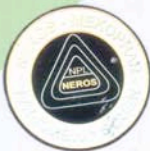

Manufactured by

MEKOPHAR CHEMICAL PHARMACEUTICAL JOINT-STOCK COMPANY

SOCIÉTÉ ANONYME CHIMIQUE-PHARMACEUTIQUE MEKOPHAR

297/5 Ly Thuong Kiet St.-Dist.11-Ho Chi Minh City-Vietnam

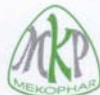

ARTESUNAT®

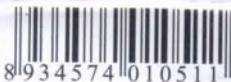

10005FX  
25/03/10  
25/03/13

Batch N°/Lot N° :  
Mfg. Date/Date de fabrication :  
Exp. Date/Date d'expiration :

Reg. N°/N° d'enregistrement : VNB-2339-04

NAFDAC REG. N°: 04-3397

A conserver dans des milieux frais, et secs à l'abri de la lumière

Store in a cool, dry place. Protect from light

Ne pas laisser à la portée des enfants

Always keep out of reach of children

Lire attentivement les instructions avant l'emploi.

Read the directions carefully before use

ch-inclus.

Mode d'emploi : Selon avis du médecin. Lire attentivement le prospectus

Dosage & Administration : As prescribed by physicians. See the enclosed leaflet.

Contre accès aigus de paludisme, y compris accès aigus de forme cérébrale.

Indications : Malaria attack and malignant malaria, including cerebral type.

ARTESUNAT®  
Artesunate 50mg

Marketed by: NEROS PHARMACEUTICALS LTD.,  
LAGOS, NIGERIA

ARTESUNAT®
